# Supplementary material for: Production of Hydroxycarboxylic Acid Receptor 3 (HCA3) Ligands by Bifidobacterium
Source: MDPI journal article supplement (doi:10.3390/microorganisms9112397), 2021-11-21
Supplement: s1 [file s1]

Table S1. List of metabolites and internal standard

| Name                           | Compounds    | Polarity | Precursor<br>(m/z) | Product<br>(m/z) | Collision<br>energy<br>(V) | CAS registry<br>number |
|--------------------------------|--------------|----------|--------------------|------------------|----------------------------|------------------------|
|                                | Abbreviation |          |                    |                  |                            |                        |
| 4-hydroxyphenyllactic acid     | 4-OH-PLA     | Positive | 200.093            | 91.167           | 30.57                      | 306-23-0               |
| 2-hydroxy-4-methylvaleric acid | LeuA         | Negative | 131.050            | 85.054           | 11.44                      | 13748-90-8             |
| 3-phenyllactic acid            | PLA          | Positive | 184.079            | 121.054          | 14.18                      | 20312-36-1             |
| indole-3-lactic acid           | ILA          | Positive | 206.100            | 130.125          | 28.93                      | 1821-52-9              |
| 3-methyl-2-oxindole            | MO           | Positive | 148.071            | 133.054          | 20.21                      | 1504-06-9              |

Table S2. List of chiral columns and analysis conditions used in the study.

| Aryl-LA  | Column           | Mobile phase      |               | Flow rate<br>(mL/min.) | Polarity | Precursor<br>(m/z) | Product<br>(m/z) | Collision<br>energy<br>(V) |
|----------|------------------|-------------------|---------------|------------------------|----------|--------------------|------------------|----------------------------|
|          |                  | A<br>H2O, 0.2% FA | B<br>Methanol |                        |          |                    |                  |                            |
| 4-OH-PLA | CHIRAKPAK IF-3   | 86%               | 14%           | 0.4                    | Negative | 181.000            | 163.042          | 11.11                      |
| PLA      | CHIRAKPAK IN-3   | 70%               | 30%           | 0.5                    | Negative | 165.029            | 147.054          | 10.01                      |
| ILA      | CHIRAKPAK IB N-3 | 70%               | 30%           | 0.5                    | Positive | 206.093            | 130.125          | 30.06                      |
| LeuA     | CHIRAKPAK IN-3   | 70%               | 30%           | 0.5                    | Negative | 131.050            | 85.125           | 11.57                      |

FA, formic acid.

Table S3. Primer pairs used for gene disruption and confirmation

| Target gene of                              | Forward primer <sup>a</sup>        | Reverse primer <sup>a</sup>          |
|---------------------------------------------|------------------------------------|--------------------------------------|
| <i>B. longum</i> subsp. <i>longum</i> 105-A |                                    |                                      |
| For gene disruption                         |                                    |                                      |
| BL105A_0985                                 | GCAGAGTACTGAGCTgcccgcgacctcgatgat  | TTTGCTCAGAATTTCGtggtggacacggaggcga   |
| BL105A_1367                                 | GCAGAGTACTGAGCTttgcagaccttcagcgccg | TTTGCTCAGAATTTCGaggcgtcagccaaggcctcg |
| For confirmation of gene disruption         |                                    |                                      |
| BL105A_0985                                 | cctcgacatgatgaccaagtt              | ggttgatggtgtcgatgct                  |
| BL105A_1367                                 | ggttggtcccttggtttggt               | tttcggattgcccgataag                  |

BL105A\_0985 (type 4 *ldh*) and BL105A\_1367 (D-2-hydroxyacid dehydrogenase) genes were amplified by PCR from the genomic DNA of *B. longum* subsp. *longum* 105-A and ligated with *Sac*I and *Nco*I -digested pKKT427 [31].
